# Supplementary figures and images for: Synthesis of Polyethylene Terephthalate (PET) with High Crystallization and Mechanical Properties via Functionalized Graphene Oxide as Nucleation Agent
Source: MDPI journal article supplement (doi:10.3390/molecules29091953), 2024-04-24

Appendix A. Supplementary data

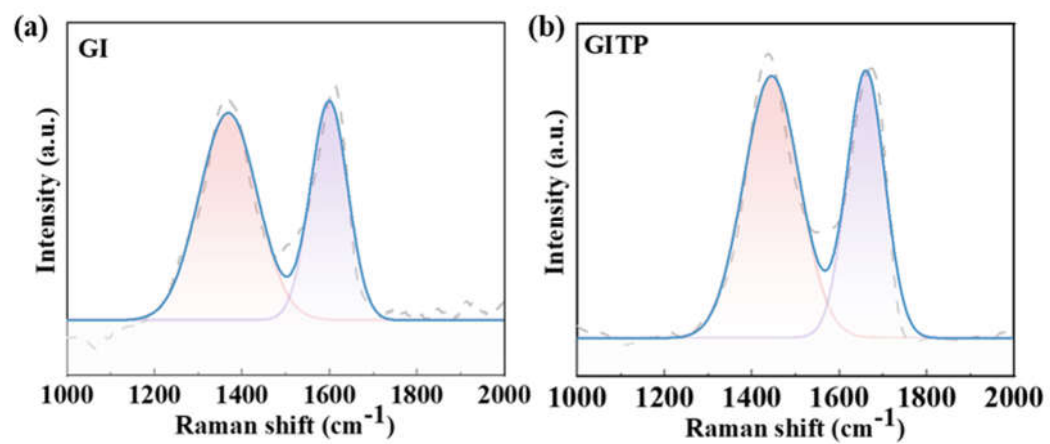

Figure S1. Raman fit plots for GI and GTP

Supplement: s1 [file s1]
